# Supplementary material for: Hypercrosslinked polymer-mediated fabrication of binary metal phosphide decorated spherical carbon as an efficient and durable bifunctional electrocatalyst for rechargeable Zn–air batteries
Source: Royal Society of Chemistry journal article supplement (doi:10.1039/d2nr03370d), 2022-01-01
Supplement: d2nr03370d1.pdf [file d2nr03370d1.pdf]

## Supporting Information

### **Hypercrosslinked polymer-mediated fabrication of binary metal phosphides decorated spherical carbon as efficient and durable bifunctional electrocatalyst for rechargeable Zn-air batteries**

Haowen Chen, Yijiang Liu, \* Bei Liu, Mei Yang, Huaming Li, and Hongbiao Chen, \*

College of Chemistry, Key Lab of Environment-Friendly Chemistry and Application in Ministry of Education, Key Laboratory of Polymeric Materials and Application Technology of Hunan Province, Xiangtan University, Xiangtan 411105, Hunan Province, P. R. China.

E-mail: [liuyijiang84@xtu.edu.cn](mailto:liuyijiang84@xtu.edu.cn) (Y Liu), [chenhongbiao@xtu.edu.cn](mailto:chenhongbiao@xtu.edu.cn) (H. Chen),

### **Experimental Section**

#### **1. Materials**

Iron(III) nitrate, and nickel(II) nitrate were purchased from Shanghai Aladdin Bio-Chem Technology Co., Ltd. Phytic acid and ethanol were purchased from Shanghai Macklin Biochemical Co., Ltd. All the chemicals were analytical agent grade and used as received.

## **2. Optimization of synthetic condition for FeCoP/NPC electrocatalysts**

### **2.1. Optimization of pyrolysis temperature**

The synthesis process is similar to that of FeCoP/NPC electrocatalyst, except the carbonization temperature (800 °C, 900 °C, 1000 °C) are different. The synthesized FeCoP/NPC electrocatalysts are named FeCoP/NPC-800, FeCoP/NPC-900 and FeCoP/NPC-1000 respectively.

### **2.2. Optimization of pyrolysis time**

The synthesis procedures were similar to that of FeCoP/NPC electrocatalyst except for different pyrolysis time at 900 °C. That is for 1, 2 and 3 h under N<sub>2</sub> blowing conditions. The resultant FeCoP/NPC electrocatalysts were named as FeCoP/NPC-1h, FeCoP/NPC-2h, and FeCoP/NPC-3h, respectively.

### **2.3. Optimization of FeCo/HCTCz mass ratios**

The synthesis procedures were similar to that of FeCoP/NPC electrocatalyst except that the mass ratio of the polymer HCTCz to the total mass of Fe/Co was set to 1:10, 1:12 and 1:14, respectively. The resultant FeCoP/NPC electrocatalysts were denoted as FeCoP/NPC-1:10, FeCoP/NPC-1:12 and FeCoP/NPC-1:14, respectively.

### **2.4. Optimization of Fe/Co molar ratio**

The synthesis procedures were similar to that of FeCoP/NPC electrocatalyst except for different Fe/Co molar ratio, the Fe/Co molar ratio was varied from 2:1, 1:1,

to 1:2, while the total molar amount of  $\text{Fe}(\text{NO}_3)_3$  and  $\text{Co}(\text{NO}_3)_2$  was remain unchanged. The resultant FeCoP/NPC electrocatalysts were named as FeCoP/NPC-2:1, FeCoP/NPC-1:1, and FeCoP/NPC-1:2, respectively.

### **2.5. Optimization of FeCo/PA mass ratio**

The synthesis procedures were similar to that of FeCoP/NPC electrocatalyst except for varied amount of PA. The mass ratio of the Fe/Co to PA was regulated to be 1:3, 1:2.25 and 1:1.5, respectively. The resultant FeCoP/NPC electrocatalysts were denoted as FeCoP/NPC-1:3, FeCoP/NPC-1:2.25 and FeCoP/NPC-1:1.5, respectively.

## **3. Characterization**

The textural properties were characterized by  $\text{N}_2$  adsorption/desorption measurements at 77.3 K using Micromeritics TriStar II 3020 surface area and porosimeter analyzer. The specific surface area was calculated by using Brunauer-Emmett-Teller (BET) method. The pore size distribution (PSD) was calculated from the adsorption branches of the isotherms by using the DFT model. The powder X-ray diffraction patterns (PXRD) were collected on a Rigaku/Max-2500PC X-ray diffractometer with  $\text{Cu K}\alpha$  radiation, and the operation voltage and current were maintained at 40 kV and 25 mA, respectively. The X-ray photoelectron spectroscopy (XPS) was performed on a K-Alpha 1063 photoelectron spectrometer (Thermo Fisher Scientific, England) with  $\text{Al-K}\alpha$  X-ray radiation as the X-ray source for excitation. Scanning electron microscopy (SEM) images were recorded using S-4800 (JEOL)

operated at an acceleration voltage of 10 kV. The transmission electron microscopy (TEM) images were recorded on a JEOL-2010 transmission electron microscope (Thermo Scientific Talos F200i) operating at 200 kV.

#### 4. Electrochemical measurements

The electrochemical experiments were conducted on a CHI760D electrochemical workstation (Chenhua Instruments Co., Shanghai) in a three-electrode system at 25 °C. A rotating disk electrode (RDE) or a rotating ring-disk electrode (RRDE) was used as the working electrode, an Ag/AgCl electrode (3 M KCl) was used as the reference electrode, and a graphite rod was used as the counter electrode in alkaline electrolyte. The fabrication of working electrode was carried out as follows: Taking FeCoP/NPC for an example, 4.0 mg catalyst was firstly dispersed in 970  $\mu\text{L}$  ethanol, then 30  $\mu\text{L}$  Nafion solution (5.0 wt%) was added, followed by sonication for 0.5 h to form a relatively homogeneous suspension. 12.0  $\mu\text{L}$  of the catalyst inks was transferred onto the glassy carbon disk electrode; the effective mass loading on glassy carbon disk electrode was about 0.7  $\text{mg cm}^{-2}$ . The same method was used to prepare Pt/C, but the effective mass loading on glassy carbon disk electrode is about 0.6  $\text{mg cm}^{-2}$ . ORR activity was evaluated by linear sweep voltammetry (LSV) techniques on rotating disk electrode (RDE) in  $\text{O}_2$ -saturated 0.1 M KOH solution by flowing  $\text{O}_2$  with varying rotating speed from 400 to 2400 rpm at a rate of 10  $\text{mV s}^{-1}$ . All measured potentials in this study were converted to reversible hydrogen electrode (RHE) according to the following equations:

$$E_{(\text{RHE})} = E_{\text{Ag}/\text{AgCl}} + 0.210 + 0.059 \times \text{pH}$$

The parameter of electron transfer number ( $n$ ) per oxygen molecule involved in the typical ORR process was calculated from the slopes of Koutecky-Levich ( $K-L$ ) equation:

$$1/J = 1/J_L + 1/J_K = 1/(B\omega^{1/2}) + 1/J_K$$

$$B = 0.2nFC_0 (D_0)^{2/3} \nu^{-1/6}$$

where  $J$ ,  $J_L$ ,  $J_k$  are the measured current density, the diffusion current density, and the kinetic current density, respectively.  $\omega$  is the electrode rotating speed in rpm,  $F$  is the Faraday constant ( $96485 \text{ C mol}^{-1}$ ),  $D_0$  is the diffusion coefficient of oxygen in  $0.1 \text{ M KOH}$  ( $1.9 \times 10^{-5} \text{ cm}^2 \text{ s}^{-1}$ ),  $\nu$  is the kinetic viscosity ( $0.01 \text{ cm}^2 \text{ s}^{-1}$ ), and  $C_0$  is the bulk concentration of oxygen ( $1.2 \times 10^{-6} \text{ mol cm}^{-3}$ ). The constant  $0.2$  is adopted when the rotation speed is expressed in rpm.

The RRDE measurements were also conducted to determine peroxide species formed and the electron transfer number ( $n$ ). The ring-disk electrode was scanned at a rate of  $10 \text{ mV s}^{-1}$  and the ring electrode potential in the RRDE system was set to  $1.4 \text{ V}$  versus RHE. The yield of peroxide species ( $\% \text{HO}_2^-$  in alkaline media) was calculated by the followed equations:

$$\% \text{HO}_2^- = 200 \times \frac{i_r / N}{i_r / N + i_d}$$

$$n = 4 \times \frac{i_d}{i_r / N + i_d}$$

where  $i_d$  and  $i_r$  are the disk and ring currents, respectively.  $N$  is current collection efficiency of Pt ring, which was determined to be  $0.37$ .

The OER electrochemical measurements were also conducted in a CHI 760D workstation connected with a three-electrode system with Pt sheet and Ag/AgCl electrodes and counter and reference electrodes, respectively. However, the working electrode for OER was prepared by drop-casting the ink (prepared in a similar method to test for ORR) onto carbon paper with a surface area of  $0.25 \text{ cm}^{-2}$  and the loading of catalyst was maintained at  $0.7 \text{ mg cm}^{-2}$ . The OER performance test was obtained by polarization curves using linear scanning voltammetry (LSV) at  $10 \text{ mV s}^{-1}$  in  $0.1 \text{ M KOH}$  under saturated  $\text{O}_2$  to provide the  $\text{O}_2/\text{H}_2\text{O}$  equilibrium at  $1.23 \text{ V}$  versus RHE (all data were reported with  $iR$  compensation. The OER potential was obtained by an  $iR$  compensation approach using the  $E - iR \times 100\%$  relationship, where  $i$  is the current and  $R$  is the uncompensated electrolyte ohmic resistance). The EIS was recorded at  $1.6 \text{ V}$  in the frequencies ranged from  $100\ 000$  to  $0.1 \text{ Hz}$  with an amplitude of  $5 \text{ mV}$  and the polarization curves were plotted as potential versus  $\log|j, \text{ mA cm}^{-2}|$  to get the Tafel plots. Accordingly, the Tafel slope ( $b$ ) can be obtained by fitting the linear portion of Tafel plots based on the equation of  $\eta = b \log(j) + a$ .

## 5. Zn-air batteries assembly

A home-made liquid Zn-air battery was assembled to access the battery performance. The catalyst inks were prepared as above mentioned in electrochemical measurements, which were uniformly drop-cast onto gas diffusion layer (GDL) carbon paper with catalyst loading of  $1.50 \text{ mg cm}^{-2}$ . To compare the battery performance, the rechargeable battery was also made from a mixed Pt/C (20 wt %, JM) and  $\text{IrO}_2$  (99.9%)

(mass ratio = 1/1, Pt/C + IrO<sub>2</sub> loadings: 1.0 mg cm<sup>-2</sup>). The reaction area of cathode is 1 cm<sup>2</sup>. Polished zinc foil was chosen as anode in 6 M KOH + 0.2 M Zn(OAc)<sub>2</sub> electrolyte.

The solid-state Zn-air battery was fabricated by a polished zinc foil as anode, the air electrode was made by dropping a certain volume of catalyst ink onto a cleaned carbon cloth substrate with a catalyst loading of 1.5 mg cm<sup>-2</sup>, gel polymer as solid electrolyte and carbon cloth as charge collector. The solid electrolyte was prepared as follow [1]: First, 9.0 g acryl amide (AM) and 3 mL GO dispersions (with concentrations at 10 mg/mL) were dispersed in 100 ml deionized water, after sonication for 20 min, the obtained solution was kept at 85 °C for 3 h under vigorous stirring. Subsequently, 10 mL acrylic acid (AA) was added and the pH of the mixture was adjusted to about 7 with NaOH solution. 0.1 g N, N'-methylenebis(acrylamide) (BIS) and 0.1 mL N, N, N', N'-Tetramethylethylenediamine (TEMED) were added for cross-linker and accelerant, respectively. Afterwards, 0.02 g initiator (ammonium persulfate) was added and stirred for 10 s. The as-obtained solution was dumped in a glassy mold. After sequent heating, removing of water and soaking in 6M KOH/0.2M Zn(CH<sub>2</sub>COO)<sub>2</sub> alkali solution (24 h), PAM-co-PAA alkaline hydrogel electrolyte was obtained.

## Figures and Tables

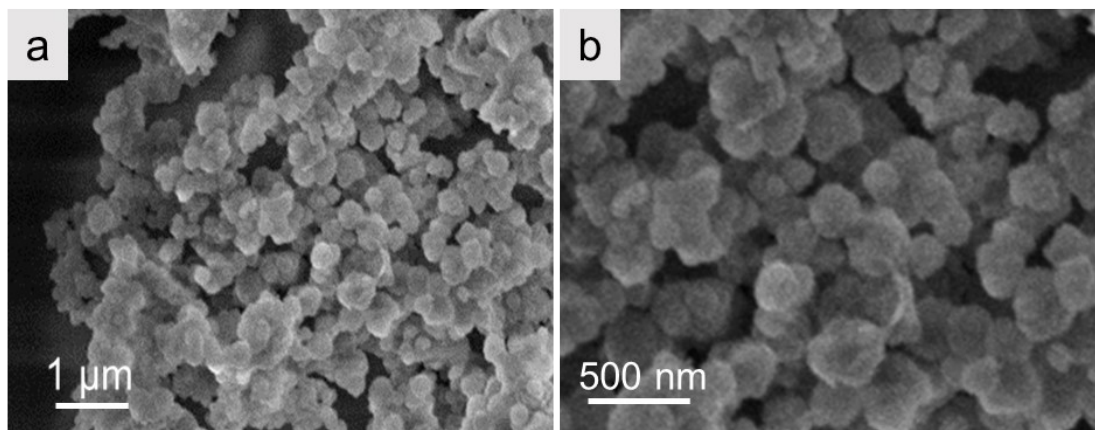

**Figure S1.** (a, b) SEM images of hypercrosslinked polymer HCTCz.

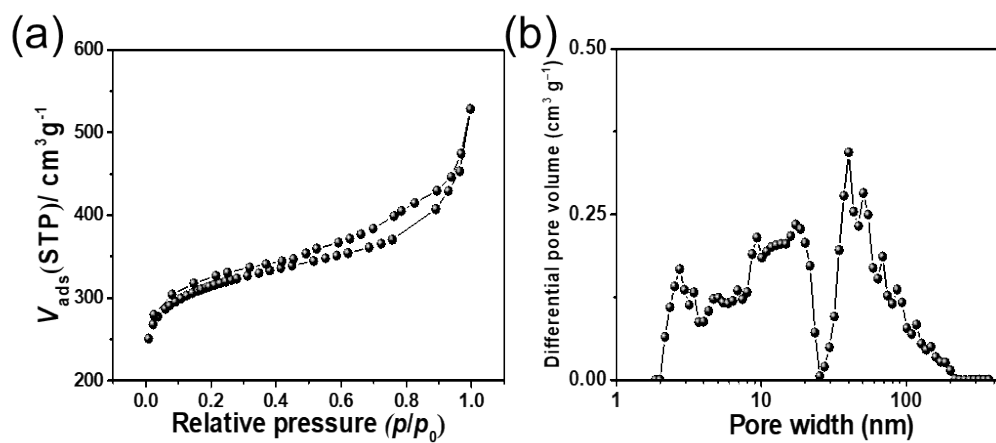

**Figure S2.** (a)  $N_2$  adsorption/desorption isotherms at 77 K and (b) Pore size distribution of HCTCz.



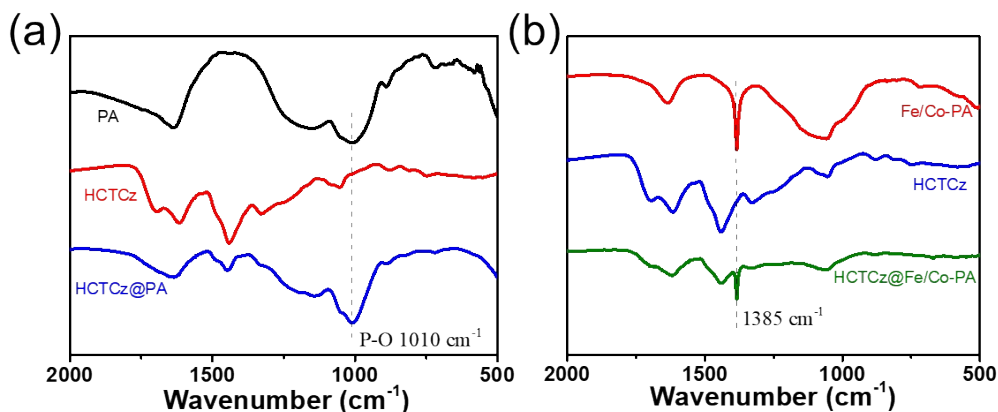

**Figure S3.** FT-IR spectra of (a) PA, HCTCz, HCTCz@PA and (b) Fe/Co-PA and HCTCz@Fe/Co-PA.

As shown in Figure S3, the characteristic band of P-O ( $1010\text{ cm}^{-1}$ ) appeared in HCTCz@PA after the absorption of PA onto (into) HCTCz. The feature peak located at  $1385\text{ cm}^{-1}$  indicated the complexation interaction between PA and Fe/Co, i.e., forming the HCTCz@Fe/Co-PA.

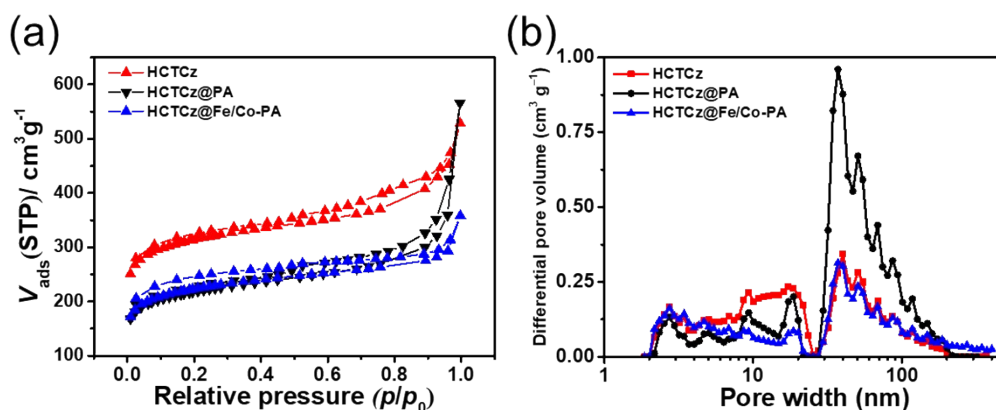

**Figure S4.** (a)  $\text{N}_2$  adsorption/desorption isotherms at 77 K and (b) pore size distribution of HCTCz, HCTCz@PA and HCTCz@Fe/Co-PA.

As shown in Figure S4, the BET surface area of HCTCz, HCTCz@PA and HCTCz@Fe/Co-PA were calculated to be  $989 \text{ m}^2 \text{ g}^{-1}$ ,  $691 \text{ m}^2 \text{ g}^{-1}$  and  $715 \text{ m}^2 \text{ g}^{-1}$ , respectively. Compared with HCTCz, the decrease of the BET surface area for HCTCz@PA and HCTCz@Fe/Co-PA is mainly due to the adsorption of PA and Fe/Co-PA on the surface and (or) pores of HCTCz.

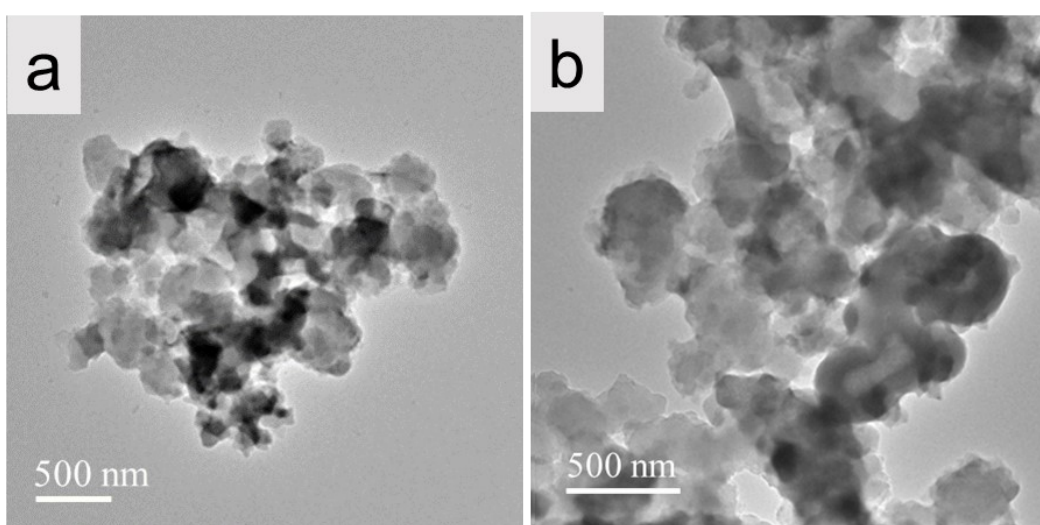

**Figure S5.** (a, b) TEM of HCTCz@Fe/Co-PA.

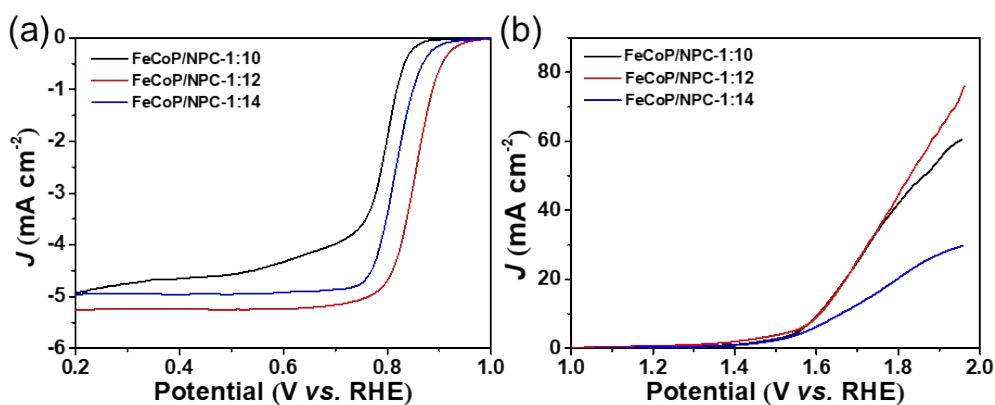

**Figure S6.** (a) ORR and (b) OER performance of FeCoP/NPC-1:10, FeCoP/NPC-1:12, and FeCoP/NPC-1:14 electrocatalysts. (1:10, 1:12, 1:14 denoted the different mass

ratio of FeCo to HCTCz)

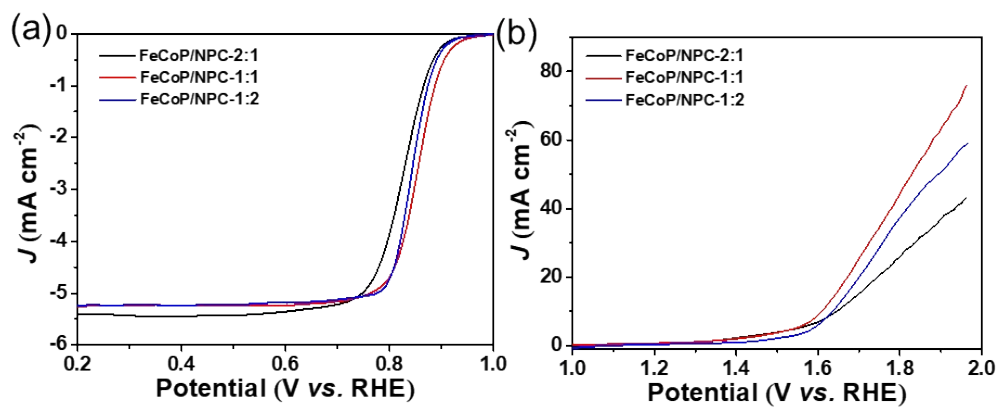

**Figure S7.** (a) ORR and (b) OER performance of FeCoP/NPC-1:3, FeCoP/NPC-1:2.25, and FeCoP/NPC-1:1.5 electrocatalysts. (1:3, 1:2.25, 1:1.5 represented the different mass ratio of FeCo and PA)

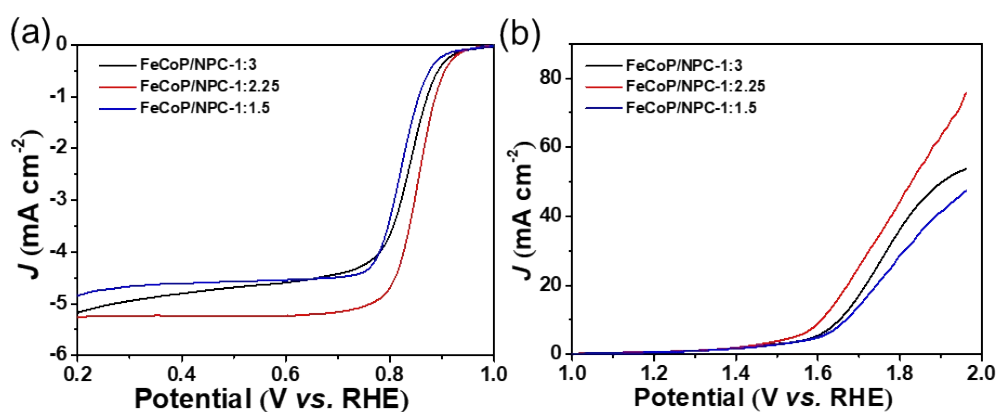

**Figure S8.** (a) ORR and (b) OER performance of FeCoP/NPC-2:1, FeCoP/NPC-1:1, and FeCoP/NPC-1:2 electrocatalysts. (2:1, 1:1, 1:2 denoted the different Fe/Co molar ratios)

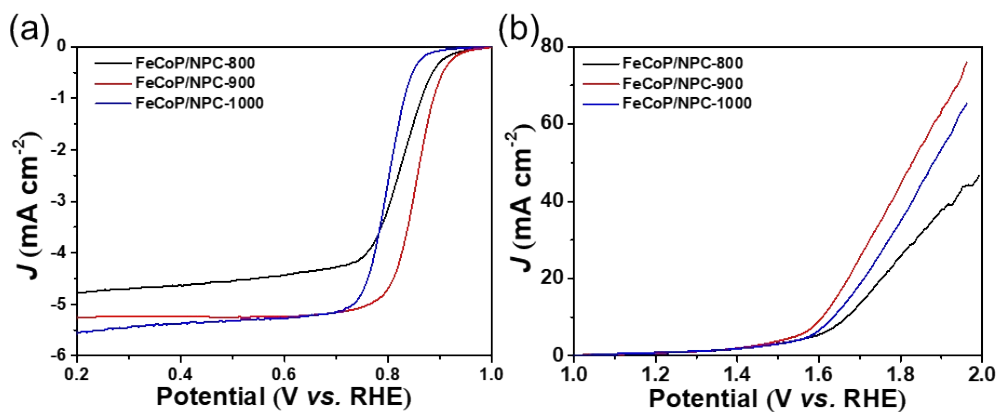

**Figure S9.** (a) ORR and (b) OER performance of FeCoP/NPC-800, FeCoP/NPC-900, and FeCoP/NPC-1000 electrocatalysts. (800/900/1000 denoted the different pyrolysis temperature)

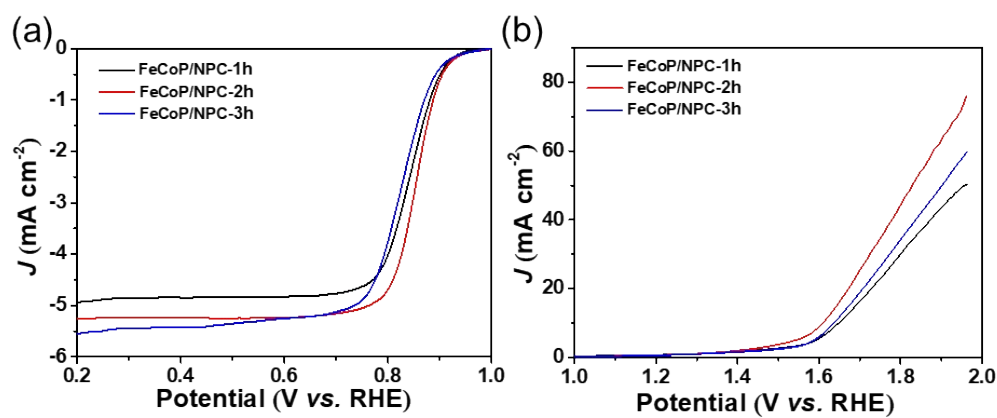

**Figure S10.** (a) ORR and (b) OER performance of FeCoP/NPC-1h, FeCoP/NPC-2h, and FeCoP/NPC-3h electrocatalysts. (1h/2h/3h denoted the different pyrolysis time)

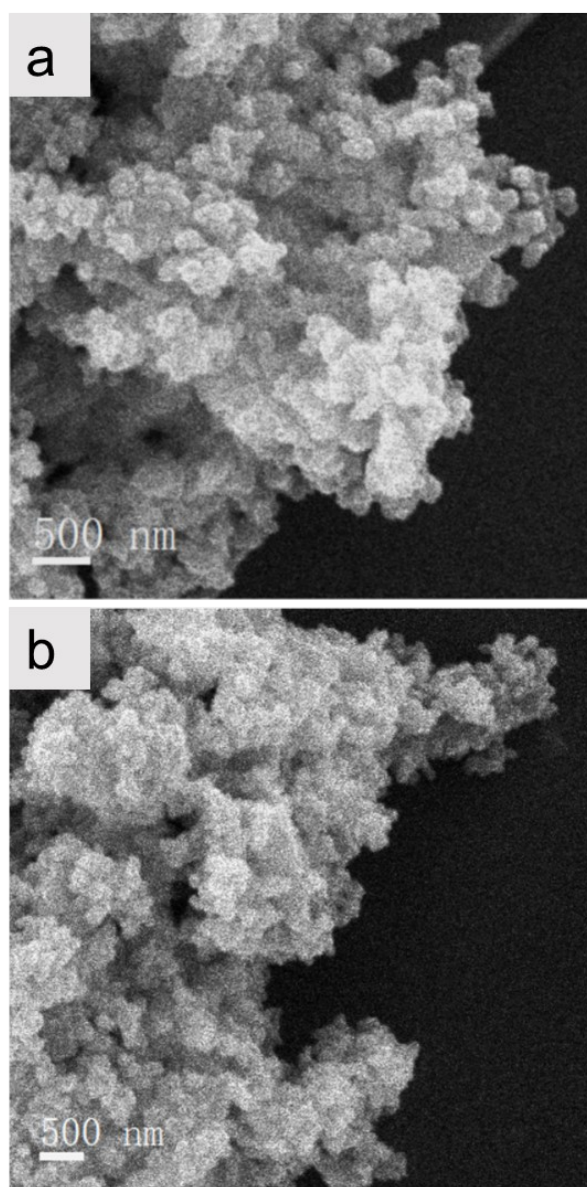

**Figure S11.** SEM images of (a) NC and (b) FeCo/NC.

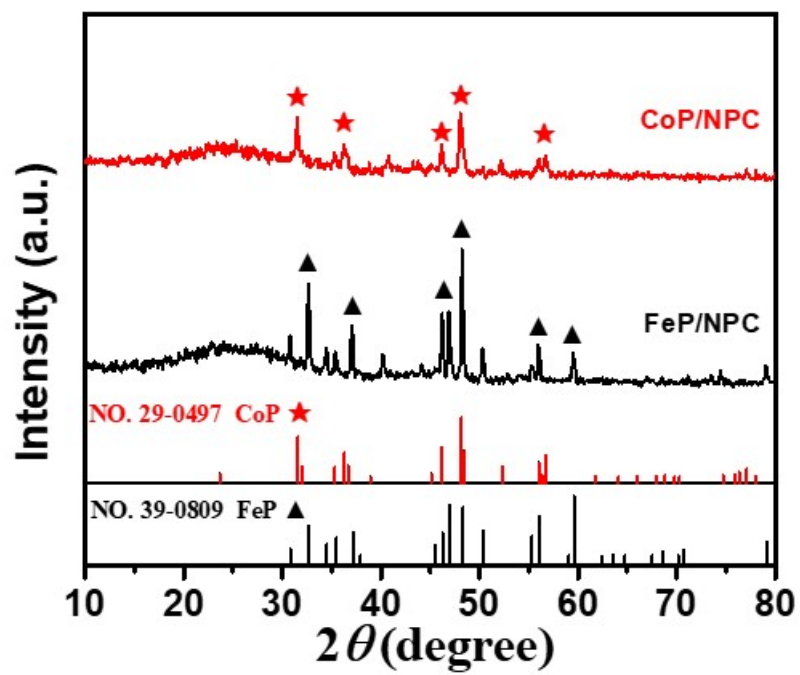

**Figure S12.** XRD patterns of FeP/NPC and CoP/NPC composites.

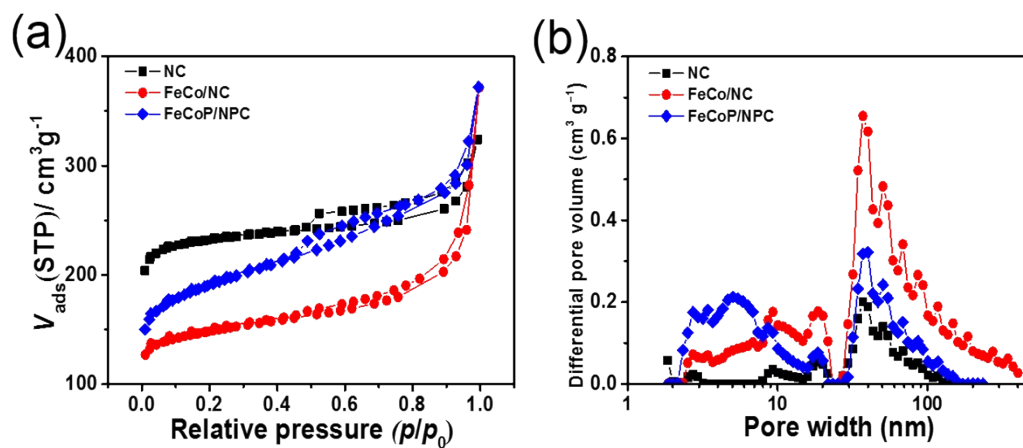

**Figure S13.** (a)  $N_2$  adsorption/desorption isotherms at 77 K and (b) Pore size distribution of NC, FeCo/NC and FeCoP/NPC electrocatalysts.

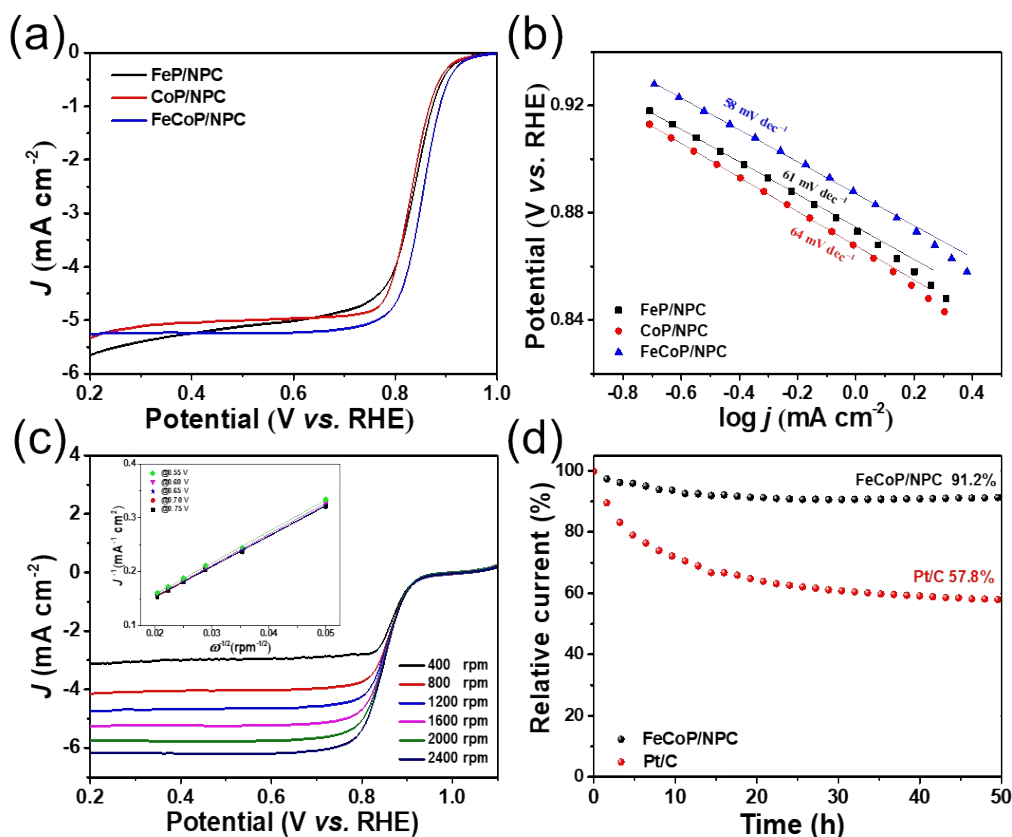

**Figure S14.** (a) ORR polarization curves of FeP/NPC, CoP/NPC and FeCoP/NPC electrocatalysts in O<sub>2</sub>-saturated 0.1 M KOH solution at 1600 rpm. (b) Tafel slopes of FeP/NPC, CoP/NPC and FeCoP/NPC electrocatalysts. (c) LSV curves of FeCoP/NPC electrocatalyst at different rotation speed (inset: the corresponding K-L plots of FeCoP/NPC electrocatalyst at different potentials). (d) Chronoamperometric measurement ( $i$ - $t$ ) of FeCoP/NPC and Pt/C at 0.7 V.



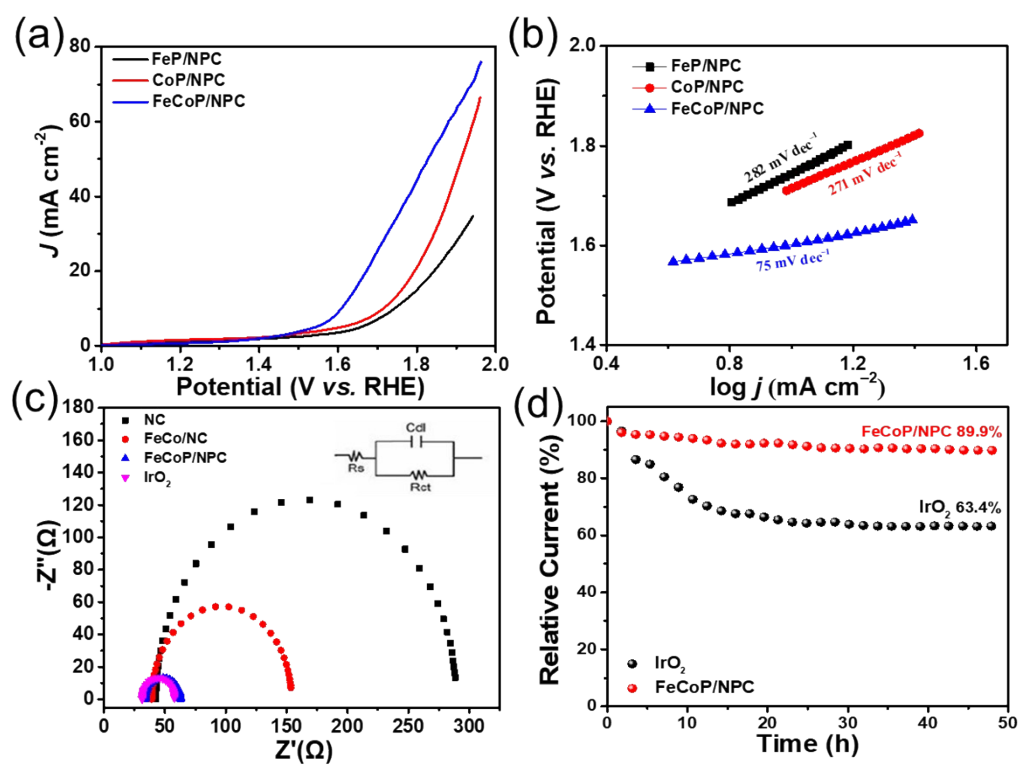

**Figure S15.** (a) OER polarization curves of FeP/NPC, CoP/NPC and FeCoP/NPC electrocatalysts in O<sub>2</sub>-saturated 0.1 M KOH solution at 1600 rpm, (b) Tafel slopes of FeP/NPC, CoP/NPC and FeCoP/NPC electrocatalysts, (c) Impedance diagrams of NC, FeCo/NC, FeCoP/NPC and IrO<sub>2</sub>, (d) Relative current versus time curves at 1.6 V of FeCoP/NPC and IrO<sub>2</sub>.

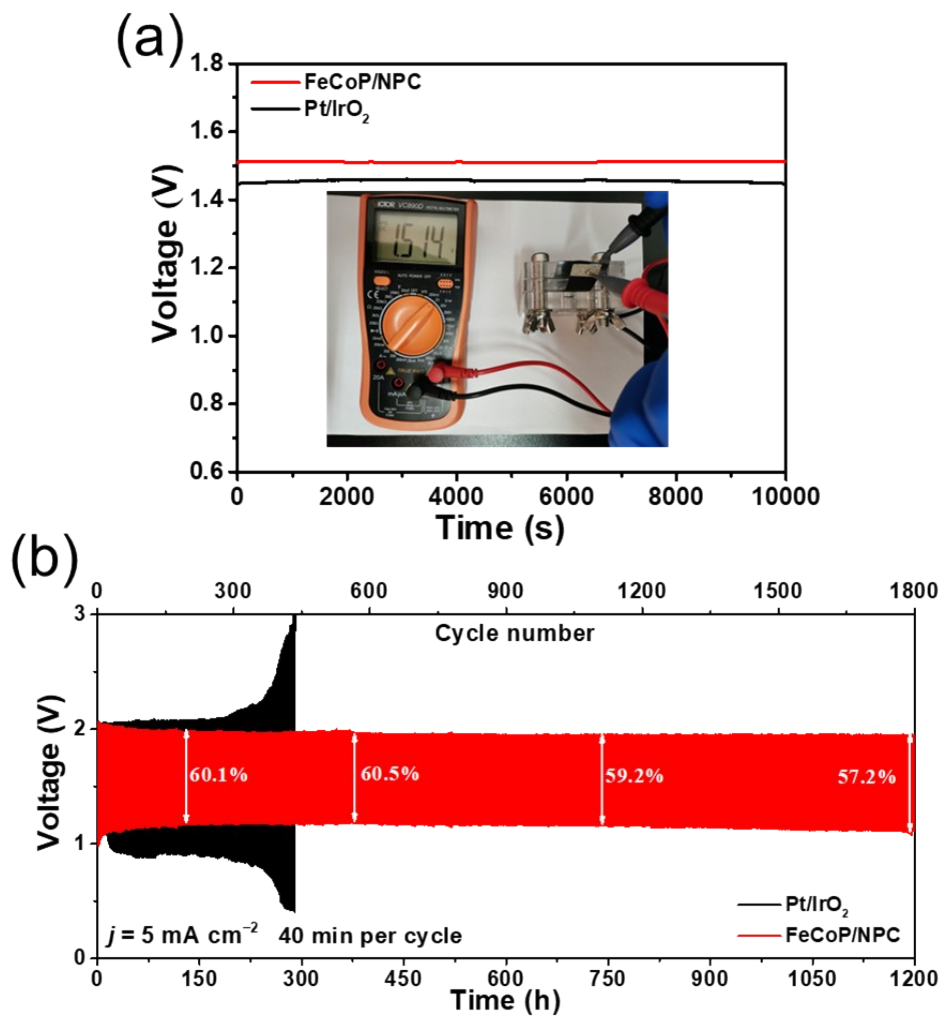

**Figure S16.** (a) Open-circuit voltage (OCV) plots (inset: photograph of FeCoP/NPC-based liquid Zn-air battery), (b) Galvanostatic discharging-charging cycle profiles of Pt/IrO<sub>2</sub> and FeCoP/NPC -based Zn-air battery at 5 mA cm<sup>-2</sup> with a cycling interval of 40 min.

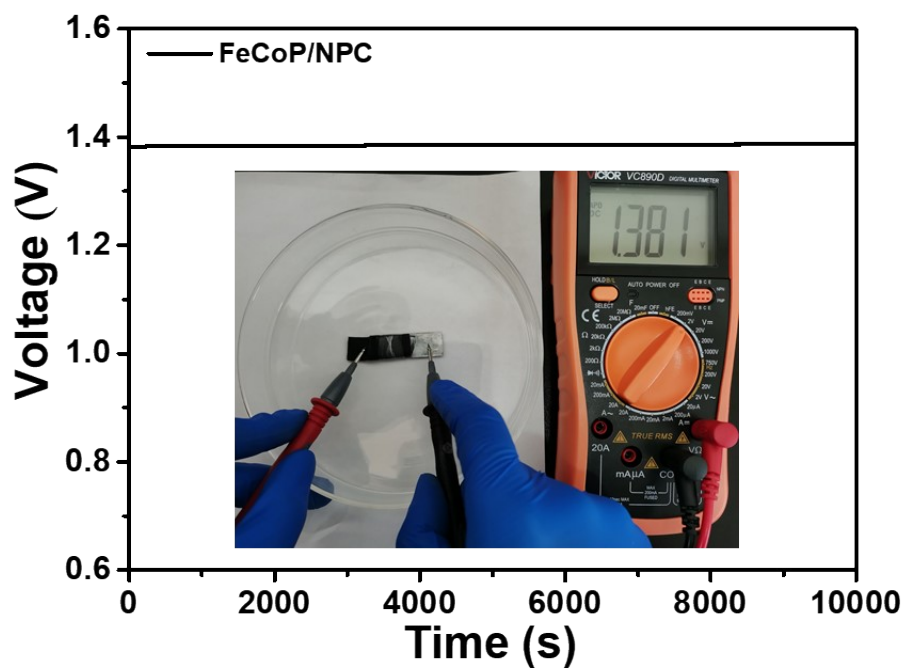

**Figure S17.** Open-circuit voltage (OCV) plots (inset: photograph of FeCoP/NPC-based solid Zn-air battery).

**Table S1.** Scrutinizing the ORR and OER performance of the as-synthesized electrocatalysts under various pyrolysis temperatures and compositions.

| Catalysts       | ORR                      | OER                       | $\Delta E$ |
|-----------------|--------------------------|---------------------------|------------|
|                 | $E_{1/2}$<br>(V vs. RHE) | $E_{j=10}$<br>(V vs. RHE) |            |
| FeCoP/NPC-800   | 0.818                    | 1.67                      | 0.852      |
| FeCoP/NPC-1000  | 0.803                    | 1.63                      | 0.905      |
| FeCoP/NPC-1h    | 0.843                    | 1.65                      | 0.807      |
| FeCoP/NPC-3h    | 0.738                    | 1.64                      | 0.902      |
| FeCoP/NPC-1:10  | 0.793                    | 1.61                      | 0.817      |
| FeCoP/NPC-1:14  | 0.818                    | 1.66                      | 0.842      |
| FeCoP/NPC-1:3   | 0.833                    | 1.65                      | 0.817      |
| FeCoP/NPC-1:1.5 | 0.818                    | 1.67                      | 0.852      |
| FeCoP/NPC       | 0.855                    | 1.61                      | 0.755      |

**Table S2.** The specific surface areas ( $S_{\text{BET}}$ ) and total pore volumes ( $V_{\text{t}}$ ) of the as-synthesized electrocatalysts.

| Electrocatalysts | $S_{\text{BET}}$ ( $\text{m}^2 \text{g}^{-1}$ ) |              |              | $V$ ( $\text{cm}^3 \text{g}^{-1}$ ) |             |             |
|------------------|-------------------------------------------------|--------------|--------------|-------------------------------------|-------------|-------------|
|                  | Total                                           | Micro        | External     | Total                               | Micro       | External    |
| <b>FeCoP/NPC</b> | <b>619.2</b>                                    | <b>428.6</b> | <b>190.6</b> | <b>0.58</b>                         | <b>0.22</b> | <b>0.36</b> |
| NC               | 711.5                                           | 665.7        | 45.8         | 0.49                                | 0.34        | 0.15        |
| FeCo/NC          | 471.1                                           | 385.7        | 85.4         | 0.57                                | 0.20        | 0.37        |
| FeP/NPC          | 561.7                                           | 446.0        | 115.7        | 0.51                                | 0.23        | 0.28        |
| CoP/NPC          | 610.3                                           | 475.5        | 134.8        | 0.79                                | 0.24        | 0.55        |

**Table S3.** ORR and OER activities of the as-synthesized electrocatalysts.

| Electrocatalysts | ORR          |              |                        | OER         |                        | $\Delta E$   |
|------------------|--------------|--------------|------------------------|-------------|------------------------|--------------|
|                  | $E_o$        | $E_{1/2}$    | $J_{@0.4}$             | $E_{j=10}$  | $J_{@1.6}$             |              |
|                  | (V vs. RHE)  | (V vs. RHE)  | (mA cm <sup>-2</sup> ) | (V vs. RHE) | (mA cm <sup>-2</sup> ) |              |
| NC               | 0.963        | 0.853        | 5.11                   | 1.94        | 2.05                   | 1.087        |
| FeCo/NC          | 0.930        | 0.835        | 5.08                   | 1.75        | 2.80                   | 0.915        |
| FeP/NC           | 0.938        | 0.835        | 5.24                   | 1.74        | 3.62                   | 0.905        |
| CoP/NC           | 0.938        | 0.833        | 5.04                   | 1.71        | 4.89                   | 0.877        |
| <b>FeCoP/NPC</b> | <b>0.948</b> | <b>0.855</b> | <b>5.23</b>            | <b>1.61</b> | <b>9.22</b>            | <b>0.755</b> |
| Pt/C             | 0.973        | 0.843        | 5.80                   | N/A         | N/A                    | 0.777        |
| IrO <sub>2</sub> | N/A          | N/A          | N/A                    | 1.62        | 8.11                   |              |

**Table S4.** The performances of FeCoP/NPC electrocatalysts for ORR/OER with those of phosphide-incorporated electrocatalysts reported in the literature.

| Catalysts                                                                    | $E_{1/2}$    | $E_{j=10}$  | $\Delta E$   | Ref.             |
|------------------------------------------------------------------------------|--------------|-------------|--------------|------------------|
| <b>FeCoP/NPC</b>                                                             | <b>0.855</b> | <b>1.61</b> | <b>0.755</b> | <b>This work</b> |
| FeP/Fe <sub>2</sub> O <sub>3</sub> @ NPCA                                    | 0.838        | 1.632       | 0.794        | 2                |
| FeCo/Co <sub>2</sub> P@NPCF                                                  | 0.79         | 1.56        | 0.77         | 3                |
| Cu-Co <sub>2</sub> P@2D-NPC                                                  | 0.835        | 1.57        | 0.735        | 4                |
| Co <sub>2</sub> P@Co-NPG                                                     | 0.808        | 1.728       | 0.92         | 5                |
| CoNiP/PNC                                                                    | 0.84         | 1.70        | 0.86         | 6                |
| Co <sub>2</sub> P@CNF                                                        | 0.803        | 1.69        | 0.887        | 7                |
| CoO/Co <sub>x</sub> P                                                        | 0.86         | 1.60        | 0.74         | 8                |
| Co <sub>2</sub> P@NCNTs                                                      | 0.82         | 1.75        | 0.93         | 9                |
| CoC <sub>x</sub> /(Co <sub>0.55</sub> Fe <sub>1.945</sub> ) <sub>2</sub> P@C | 0.84         | 1.62        | 0.78         | 10               |
| Fe <sub>2</sub> P@CNSs                                                       | 0.84         | 1.63        | 0.79         | 11               |
| Co-NC@CoP-NC                                                                 | 0.78         | 1.56        | 0.78         | 12               |
| CoP@mNSP-C                                                                   | 0.90         | 1.64        | 0.74         | 13               |
| CoP-DC                                                                       | 0.81         | 1.57        | 0.76         | 14               |

Note: All ORR/OER tests were conducted in 0.1 M KOH aqueous solution.

**Table S5.** Comparison of the FeCoP/NPC-based ZAB with those of phosphide-incorporated electrocatalysts reported in the literature.

| Catalysts                                | Power Density<br>(mW cm <sup>-2</sup> ) | Stability of<br>Cycles/Time                                                                                                         | Ref.             |
|------------------------------------------|-----------------------------------------|-------------------------------------------------------------------------------------------------------------------------------------|------------------|
| <b>FeCoP/NPC</b>                         | <b>136</b>                              | <b>2475/1650 h @ 2 mA cm<sup>-2</sup></b><br><b>1800/1200 h @ 5 mA cm<sup>-2</sup></b><br><b>1425/950 h @ 10 mA cm<sup>-2</sup></b> | <b>This work</b> |
| FeP/Fe <sub>2</sub> O <sub>3</sub> @NPCA | 130                                     | 1200/200 h @ 1 mA cm <sup>-2</sup><br>1020/170 h @ 5 mA cm <sup>-2</sup><br>756/126 h @ 10 mA cm <sup>-2</sup>                      | 2                |
| FeCo/Co <sub>2</sub> P@NPCF              | 154                                     | 642/107 h @ 10 mA cm <sup>-2</sup>                                                                                                  | 3                |
| Cu-Co <sub>2</sub> P@2D-NPC              | 236                                     | 480/160 h @<br>charge 2 mA cm <sup>-2</sup><br>discharge 10 mA cm <sup>-2</sup>                                                     | 4                |
| CoO/Co <sub>x</sub> P                    | 122.7                                   | 400/200 h @ 5 mA cm <sup>-2</sup>                                                                                                   | 8                |
| CoNiP/PNC                                | 171                                     | 57 h @ 10 mA cm <sup>-2</sup>                                                                                                       | 6                |
| Co <sub>2</sub> P@CNF                    | 103.5                                   | 55 h @ 2 mA cm <sup>-2</sup>                                                                                                        | 7                |
| CuCoP-NC-700                             | 116.5                                   | 80/80 h @ 10 mA cm <sup>-2</sup>                                                                                                    | 15               |
| Co <sub>2</sub> P/NPG                    | 103.5                                   | 100/50 h @ 2 mA cm <sup>-2</sup>                                                                                                    | 16               |
| CoP/NP-HPC                               | 186                                     | 240/80 h @ 2 mA cm <sup>-2</sup>                                                                                                    | 17               |



## References

- [1] Jin T, Yin H, Easton C D, *European Polymer Journal*, 2019, **117**, 148-158.
- [2] Wu K, Zhang L, Yuan Y, *Advanced Materials*, 2020, **32**, 2002292.
- [3] Shi Q, Liu Q, Ma Y, *Advanced Energy Materials*, 2020, **10**, 1903854.
- [4] Diao L, Yang T, Chen B, *Journal of Materials Chemistry A*, 2019, **7**, 21232-21243.
- [5] Jiang H, Li C, Shen H, *Electrochimica Acta*, 2017, **231**, 344-353.
- [6] Sun W, Xu Y, Yin P, *Applied Surface Science*, 2021, **554**, 149670.
- [7] Gao J, Wang J, Zhou L, *ACS applied materials & interfaces*, 2019, **11**, 10364-10372.
- [8] Niu Y, Xiao M, Zhu J, *Journal of Materials Chemistry A*, 2020, **8**, 9177-9184.
- [9] Peng X, Liu Y, Hu S, *Journal of Alloys and Compounds*, 2021, **889**, 161628.
- [10] Wu Y, Xiao Z, Jin Z, *Journal of Colloid and Interface Science*, 2021, **590**, 321-329.
- [11] Fan H, Liu H, Hu X, *Journal of Materials Chemistry A*, 2019, **7**, 11321-11330.
- [12] Li X, Jiang Q, Dou S, *Journal of Materials Chemistry A*, 2016, **4**, 15836-15840.
- [13] Ahn S H, Manthiram A, *Small*, 2017, **13**, 1702068.
- [14] Lin Y, Yang L, Zhang Y, *Advanced Energy Materials*, 2018, **8**, 1703623.
- [15] Zhang H, Yang Z, Wang X, *Nanoscale*, 2019, **11**, 17384-17395.
- [16] Shao Q, Li Y, Cui X, *ACS Sustainable Chemistry & Engineering*, 2020, **8**, 6422-6432.
- [17] Wang Y, Wu M, Li J, *Journal of Materials Chemistry A*, 2020, **8**, 19043-19049.
